# Supplementary material
Source: Springer Nature journal article supplement (https://www.springermedizin.de/resource/supplementary/12875_2010_534_MOESM2_ESM.pdf/9434840)

**FOCT**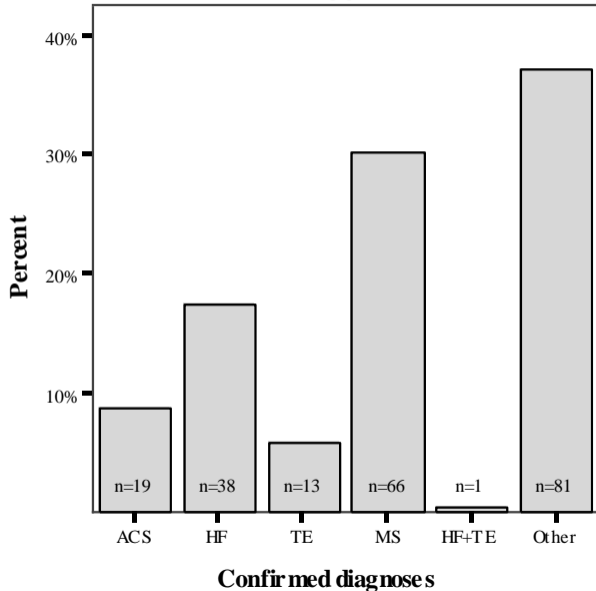**Controls**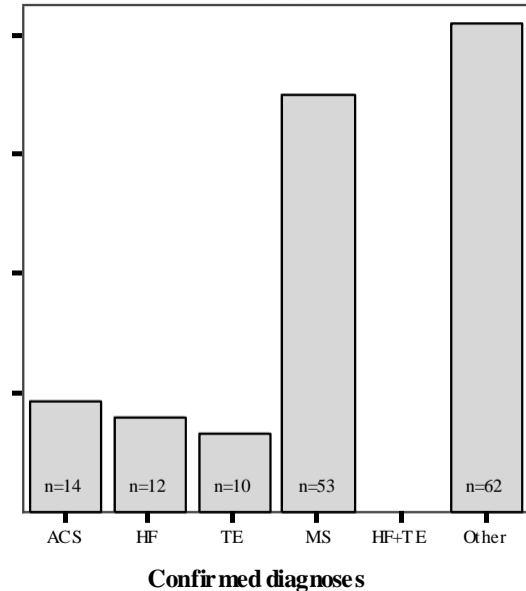

Supplement: MOESM2 [file 9434840]
